# Supplementary material for: An analysis of the global burden of pancreatic cancer attributable to High fasting plasma glucose: 1990– 2021
Source: Research Square preprint supplement (doi:10.21203/rs.3.rs-7063506/v1), 2025-07-25
Supplement: Supplementary file 1 [file 47654db7934a54d51b2cbfbe.xlsx]

## Sheet: Sheet1
DALYs and ASDR of PC attributable to the HFPG in 1990 and 2021 and EAPC from 1990 to 2021.
DALYs	1990		2021
	DALYs cases	ASDR (per 100,000)	DALYs cases	ASDR (per 100,000)	EAPC (1990–2021)
Location	No. (95%UI)	No. (95%UI)	No. (95%UI)	No. (95%UI)	No. (95%UI)
Global	2751644.072 (315351.257,5201444.182)	22.643 (2.585,44.596)	888340.313 (101475.21,1748791.401)	31.7 (3.629,59.902)	1.219 (1.158,1.281)
High SDI	405391.878 (46883.589,779028.714)	36.445 (4.214,70.155)	1123096.569 (132009.348,2081218.17)	53.796 (6.341,99.482)	1.418 (1.323,1.514)
High-middle SDI	276126.063 (31048.118,548071.487)	27.402 (3.085,54.29)	780980.644 (88773.547,1495761.659)	38.862 (4.415,74.422)	1.281 (1.205,1.357)
Middle SDI	157444.176 (17875.843,317859.938)	15.166 (1.715,30.567)	600968.712 (67181.854,1168844.237)	21.879 (2.436,42.524)	1.251 (1.2,1.301)
Low-middle SDI	36355.588 (3899.16,72180.472)	6.008 (0.645,11.894)	200647.571 (22299.873,403252.284)	13.911 (1.542,27.88)	2.844 (2.81,2.878)
Low SDI	11631.603 (1211.063,23216.348)	5.193 (0.539,10.359)	42577.06 (4519.108,83652.996)	8.596 (0.902,16.873)	1.605 (1.447,1.762)
High-income Asia Pacific	85131.149 (10494.275,156593.855)	41.937 6.008 (0.645,11.894)	219416.548 (27003.763,397222.316)	46.785 13.911 (1.542,27.88)	0.340 (0.291,0.389)
Central Asia	4741.367 (468.293,9630.634)	9.897 27.402 (3.085,54.29)	20187.494 (2119.623,40591.333)	24.182 38.862 (4.415,74.422)	3.252 (3.000,3.504)
East Asia	186559.787 (20779.638,374076.389)	20.79 0.235 (0.024,0.47)	629247.382 (71584.289,1197418.893)	28.002 0.401 (0.041,0.788)	1.165 (1.025,1.304)
South Asia	29150.128 (3241.353,56541.376)	5.011 1.235 (0.139,2.452)	142674.023 (15821.901,271951.096)	9.561 1.815 (0.204,3.471)	1.908 (1.792,2.024)
Southeast Asia	22017.976 (2210.844,46536.059)	8.859 36.445 (4.214,70.155)	122391.61 (12430.588,254200.002)	18.657 53.796 (6.341,99.482)	2.336 (2.277,2.394)
Australasia	6530.756 (791.991,11891.298)	27.494 1.235 (0.139,2.452)	20342.888 (2571.458,35621.079)	38.314 1.815 (0.204,3.471)	1.303 (1.216,1.389)
Caribbean	6719.731 (741.77,13278.681)	26.07 27.402 (3.085,54.29)	18427.579 (2151.826,36337.322)	34.114 38.862 (4.415,74.422)	1.290 (1.147,1.432)
Central Europe	58714.382 (6721.731,113836.795)	38.416 5.193 (0.539,10.359)	136586.54 (16621.457,254704.003)	61.328 8.596 (0.902,16.873)	1.590 (1.467,1.714)
Eastern Europe	62512.972 (6587.085,129371.287)	21.783 15.166 (1.715,30.567)	133011.113 (14146.234,263603.397)	37.441 21.879 (2.436,42.524)	1.729 (1.549,1.911)
Western Europe	184101.355 (19739.042,366090.688)	31.496 0.687 (0.077,1.385)	427164.344 (44747.399,845571.006)	46.371 1.003 (0.11,1.96)	1.446 (1.371,1.522)
Andean Latin America	2978.693 (287.491,6249.194)	15.099 0.272 (0.029,0.534)	16534.638 (1785.716,34252.74)	28.387 0.634 (0.07,1.255)	2.128 (1.986,2.269)
Central Latin America	23412.128 (2764.306,44210.486)	28.645 5.193 (0.539,10.359)	83642.117 (10371.092,159644.034)	33.194 8.596 (0.902,16.873)	0.194 (0.086,0.303)
Southern Latin America	17192.507 (1929.755,33309.491)	36.731 0.235 (0.024,0.47)	46081.501 (5387.045,87772.919)	52.554 0.401 (0.041,0.788)	1.321 (1.18,1.462)
Tropical Latin America	21750.475 (2256.829,43668.963)	24.141 15.166 (1.715,30.567)	94294.113 (10886.937,177957.243)	36.349 21.879 (2.436,42.524)	1.528 (1.46,1.595)
North Africa and Middle East	21447.92 (2259.251,43021.294)	12.919 36.445 (4.214,70.155)	143350.69 (16496.505,271337.969)	31.865 53.796 (6.341,99.482)	3.330 (3.188,3.472)
High-income North America	142314.154 (17194.65,265972.305)	40.839 1.727 (0.199,3.299)	437630.538 (54347.088,788873.424)	66.173 2.663 (0.311,4.959)	1.771 (1.607,1.935)
Oceania	362.789 (41.647,721.597)	12.612 0.687 (0.077,1.385)	1350.256 (159.306,2671.946)	18.08 1.003 (0.11,1.96)	1.261 (1.184,1.338)
Central Sub-Saharan Africa	2479.245 (285.296,4828.301)	10.98 1.727 (0.199,3.299)	7840.836 (931.04,15962.864)	14.207 2.663 (0.311,4.959)	0.758 (0.506,1.011)
Eastern Sub-Saharan Africa	3214.774 (311.988,6875.724)	4.591 6.008 (0.645,11.894)	12720.748 (1243.879,27909.712)	8.006 13.911 (1.542,27.88)	1.715 (1.607,1.822)
Southern Sub-Saharan Africa	4035.479 (390.52,8557.841)	15.627 36.445 (4.214,70.155)	19492.057 (1830.698,39984.968)	34.312 53.796 (6.341,99.482)	2.856 (2.504,3.209)
Western Sub-Saharan Africa	2972.545 (311.14,5974.294)	3.491 0.687 (0.077,1.385)	19257.056 (1999.531,39693.783)	10.306 1.003 (0.11,1.96)	3.881 (3.761,4.000)
