# Supplementary material for: An analysis of the global burden of pancreatic cancer attributable to High fasting plasma glucose: 1990– 2021
Source: Research Square preprint supplement (doi:10.21203/rs.3.rs-7063506/v1), 2025-07-25

Additional file 5 Age-standardized DALY rate and ASMR of PC attributable to HFPG in 204 countries by the SDI, 1990–2021.


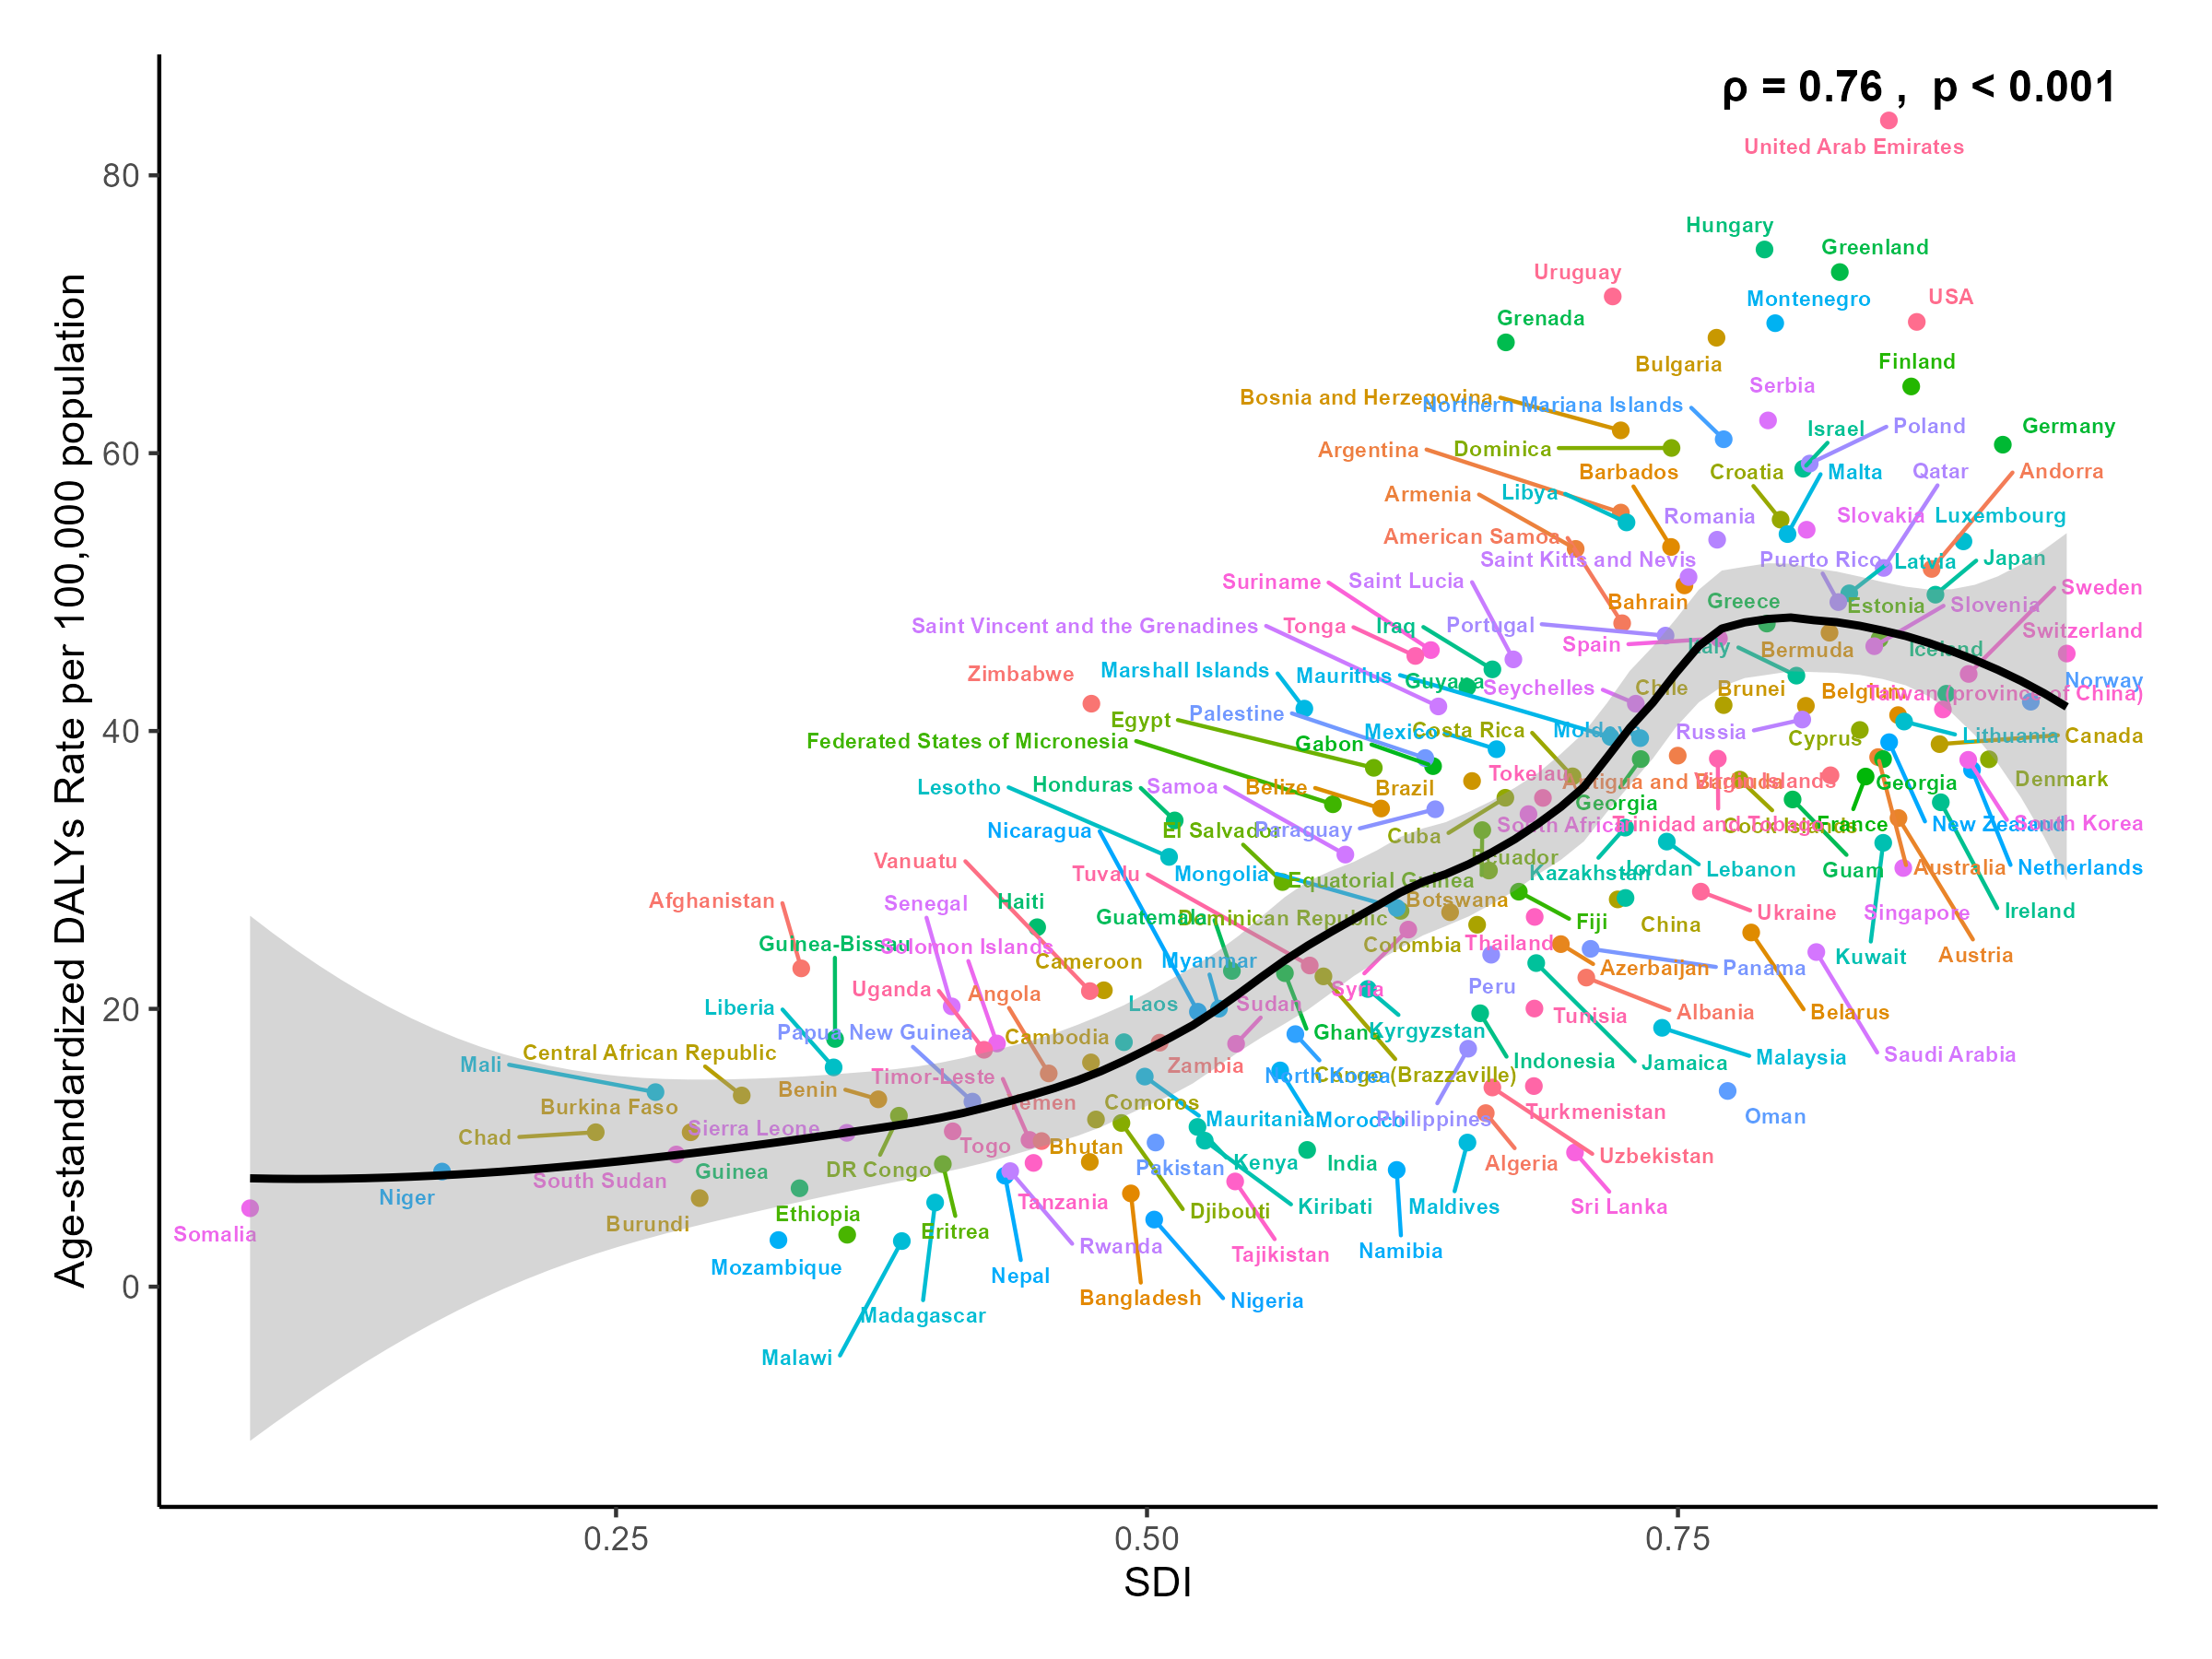

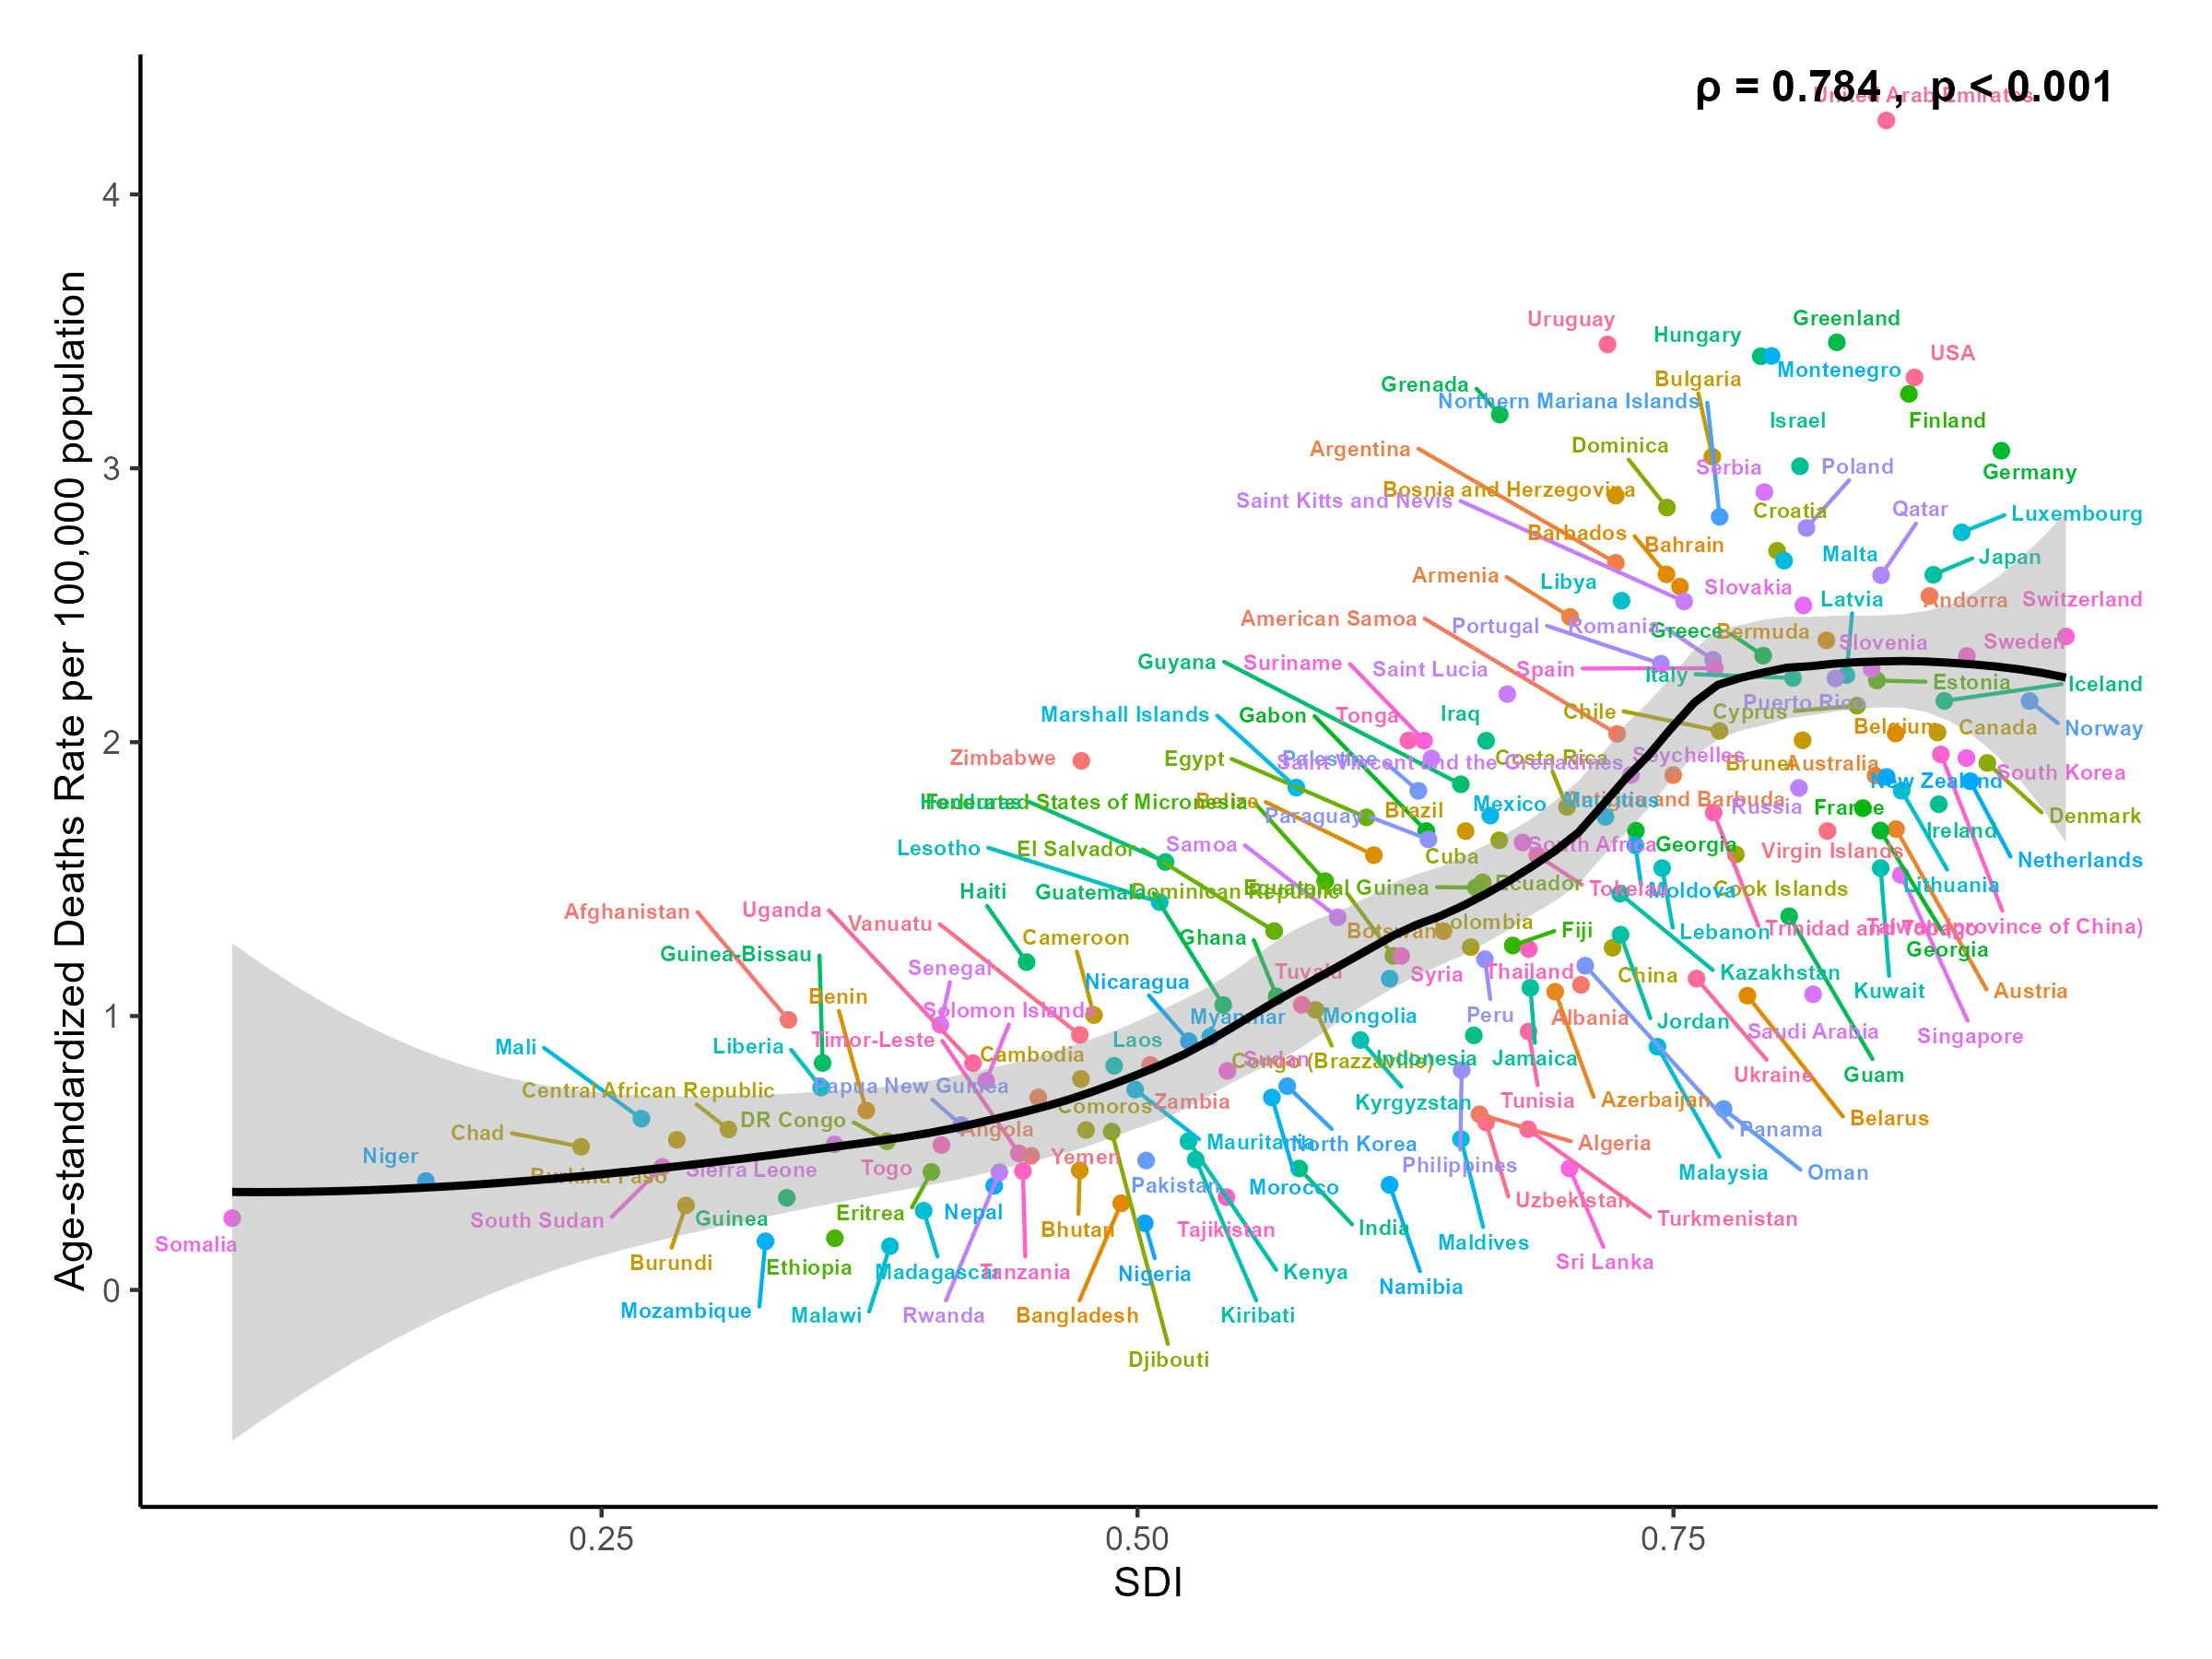

Supplement: Supplementary file 2 [file 6cf7aa9d7e434c140c8c7efc.docx]
