# Supplementary material for: An analysis of the global burden of pancreatic cancer attributable to High fasting plasma glucose: 1990– 2021
Source: Research Square preprint supplement (doi:10.21203/rs.3.rs-7063506/v1), 2025-07-25
Supplement: Supplementary file 3 [file 8a52adf1d1dedef379a90439.docx]

Additional file 4 Age-specific numbers and rates of DALYs and deaths of PC attributable to HFPG by age and sex, 1990-2021.
