# Supplementary material for: An analysis of the global burden of pancreatic cancer attributable to High fasting plasma glucose: 1990– 2021
Source: Research Square preprint supplement (doi:10.21203/rs.3.rs-7063506/v1), 2025-07-25

Supplementary Figure S1 The number of deaths from PC attributable to HFPG in different SDIs and globally, in 2021.


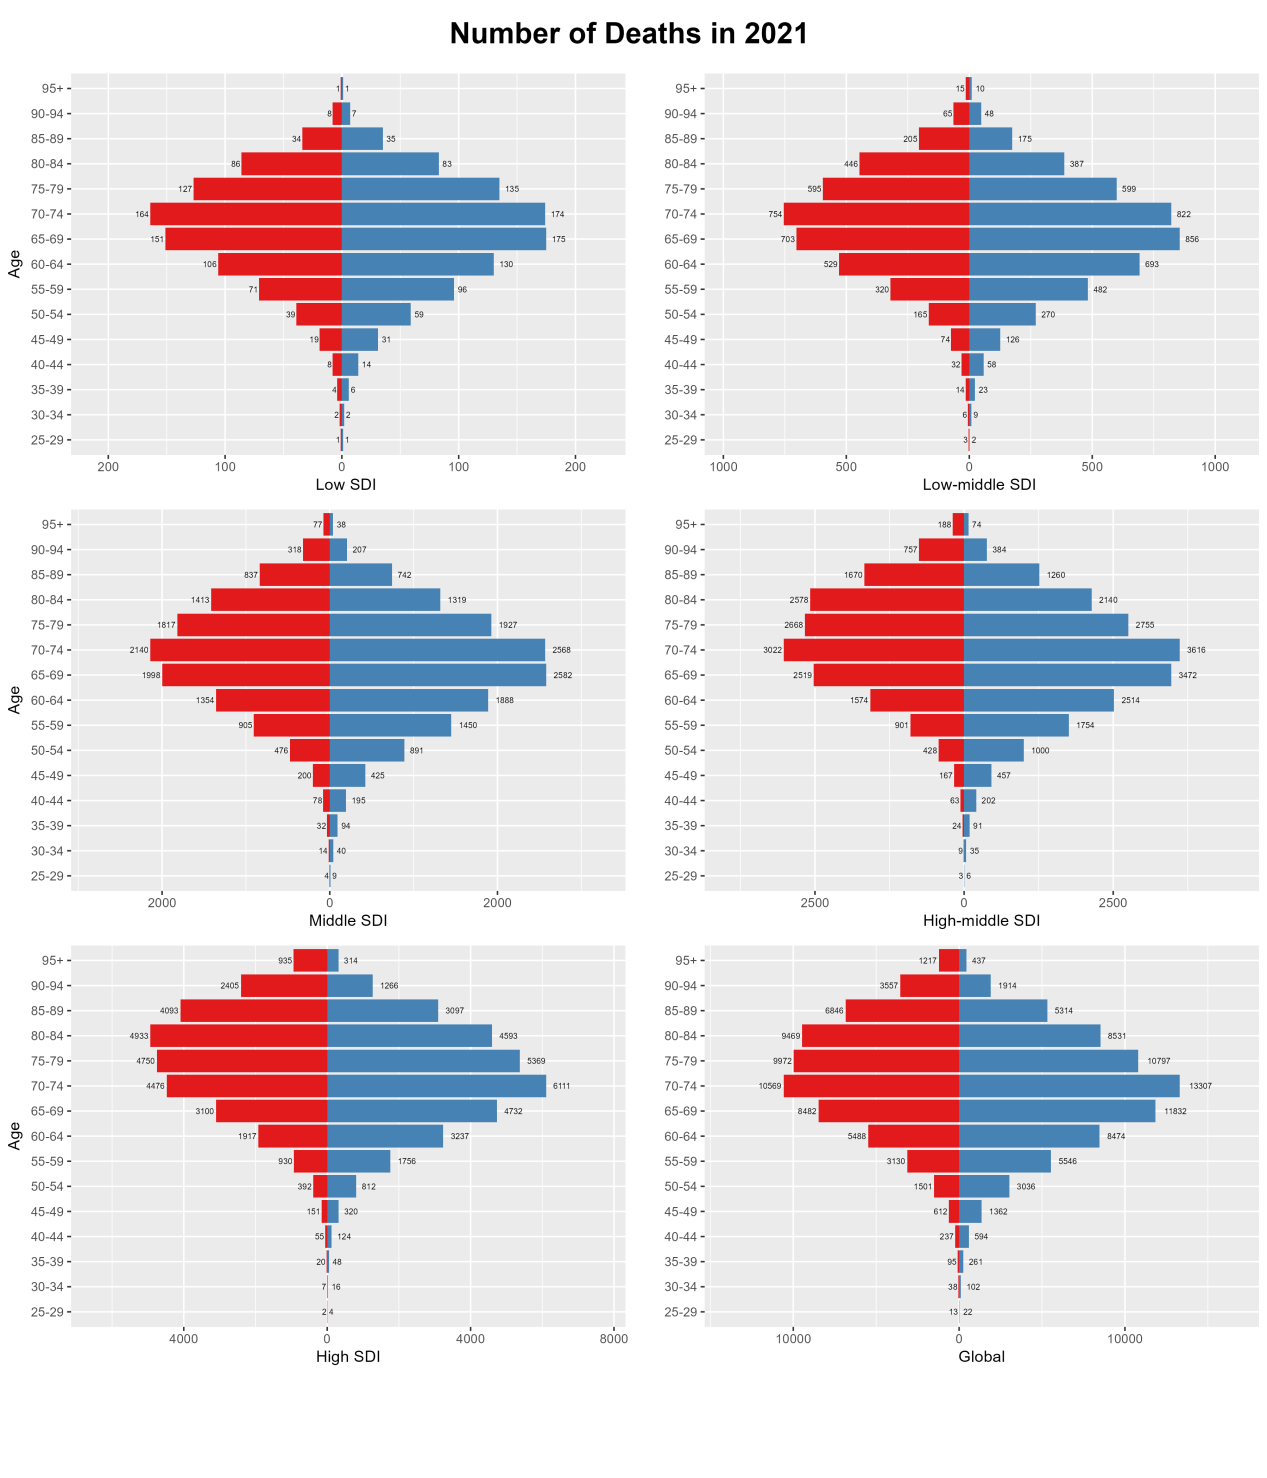


Supplementary Figure S2 The number of DALYs from PC attributable to HFPG in different SDIs and globally, in 2021.


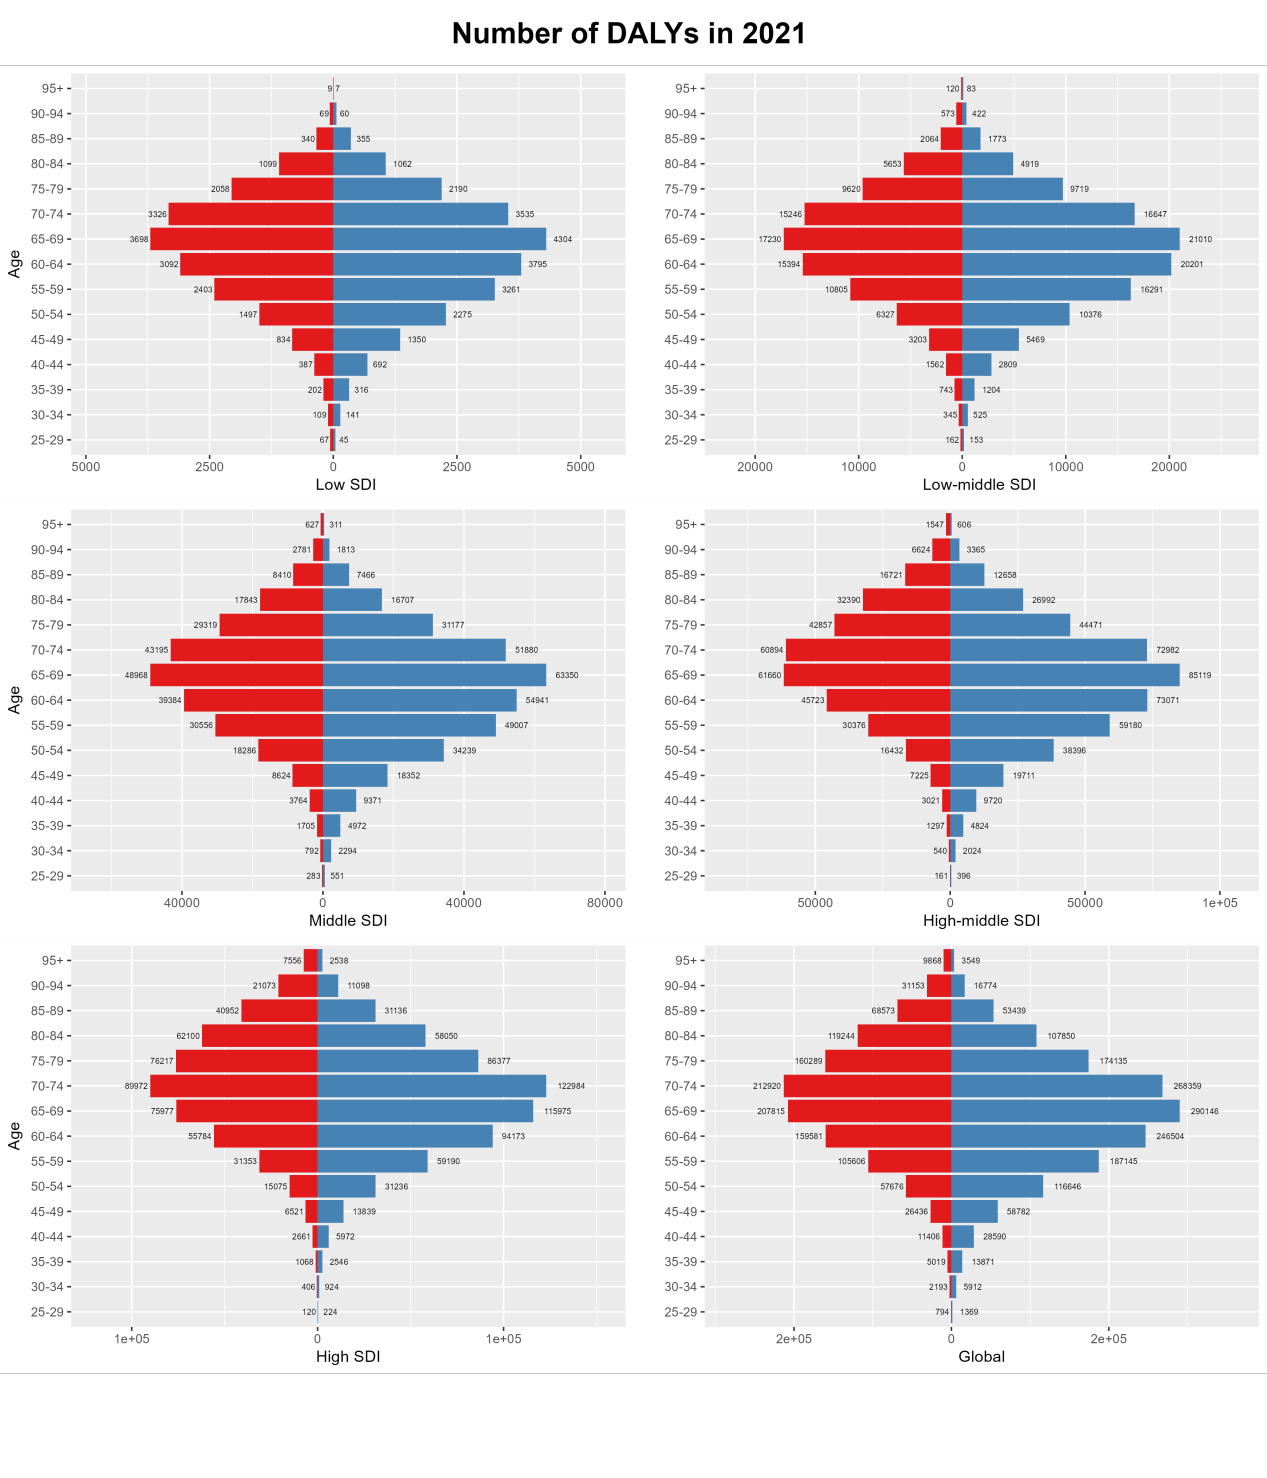


Supplementary Figure S3 Age-standardized DALY rate (ASDR) of PC attributable to HFPG per 100,000 population in 2021, by country.


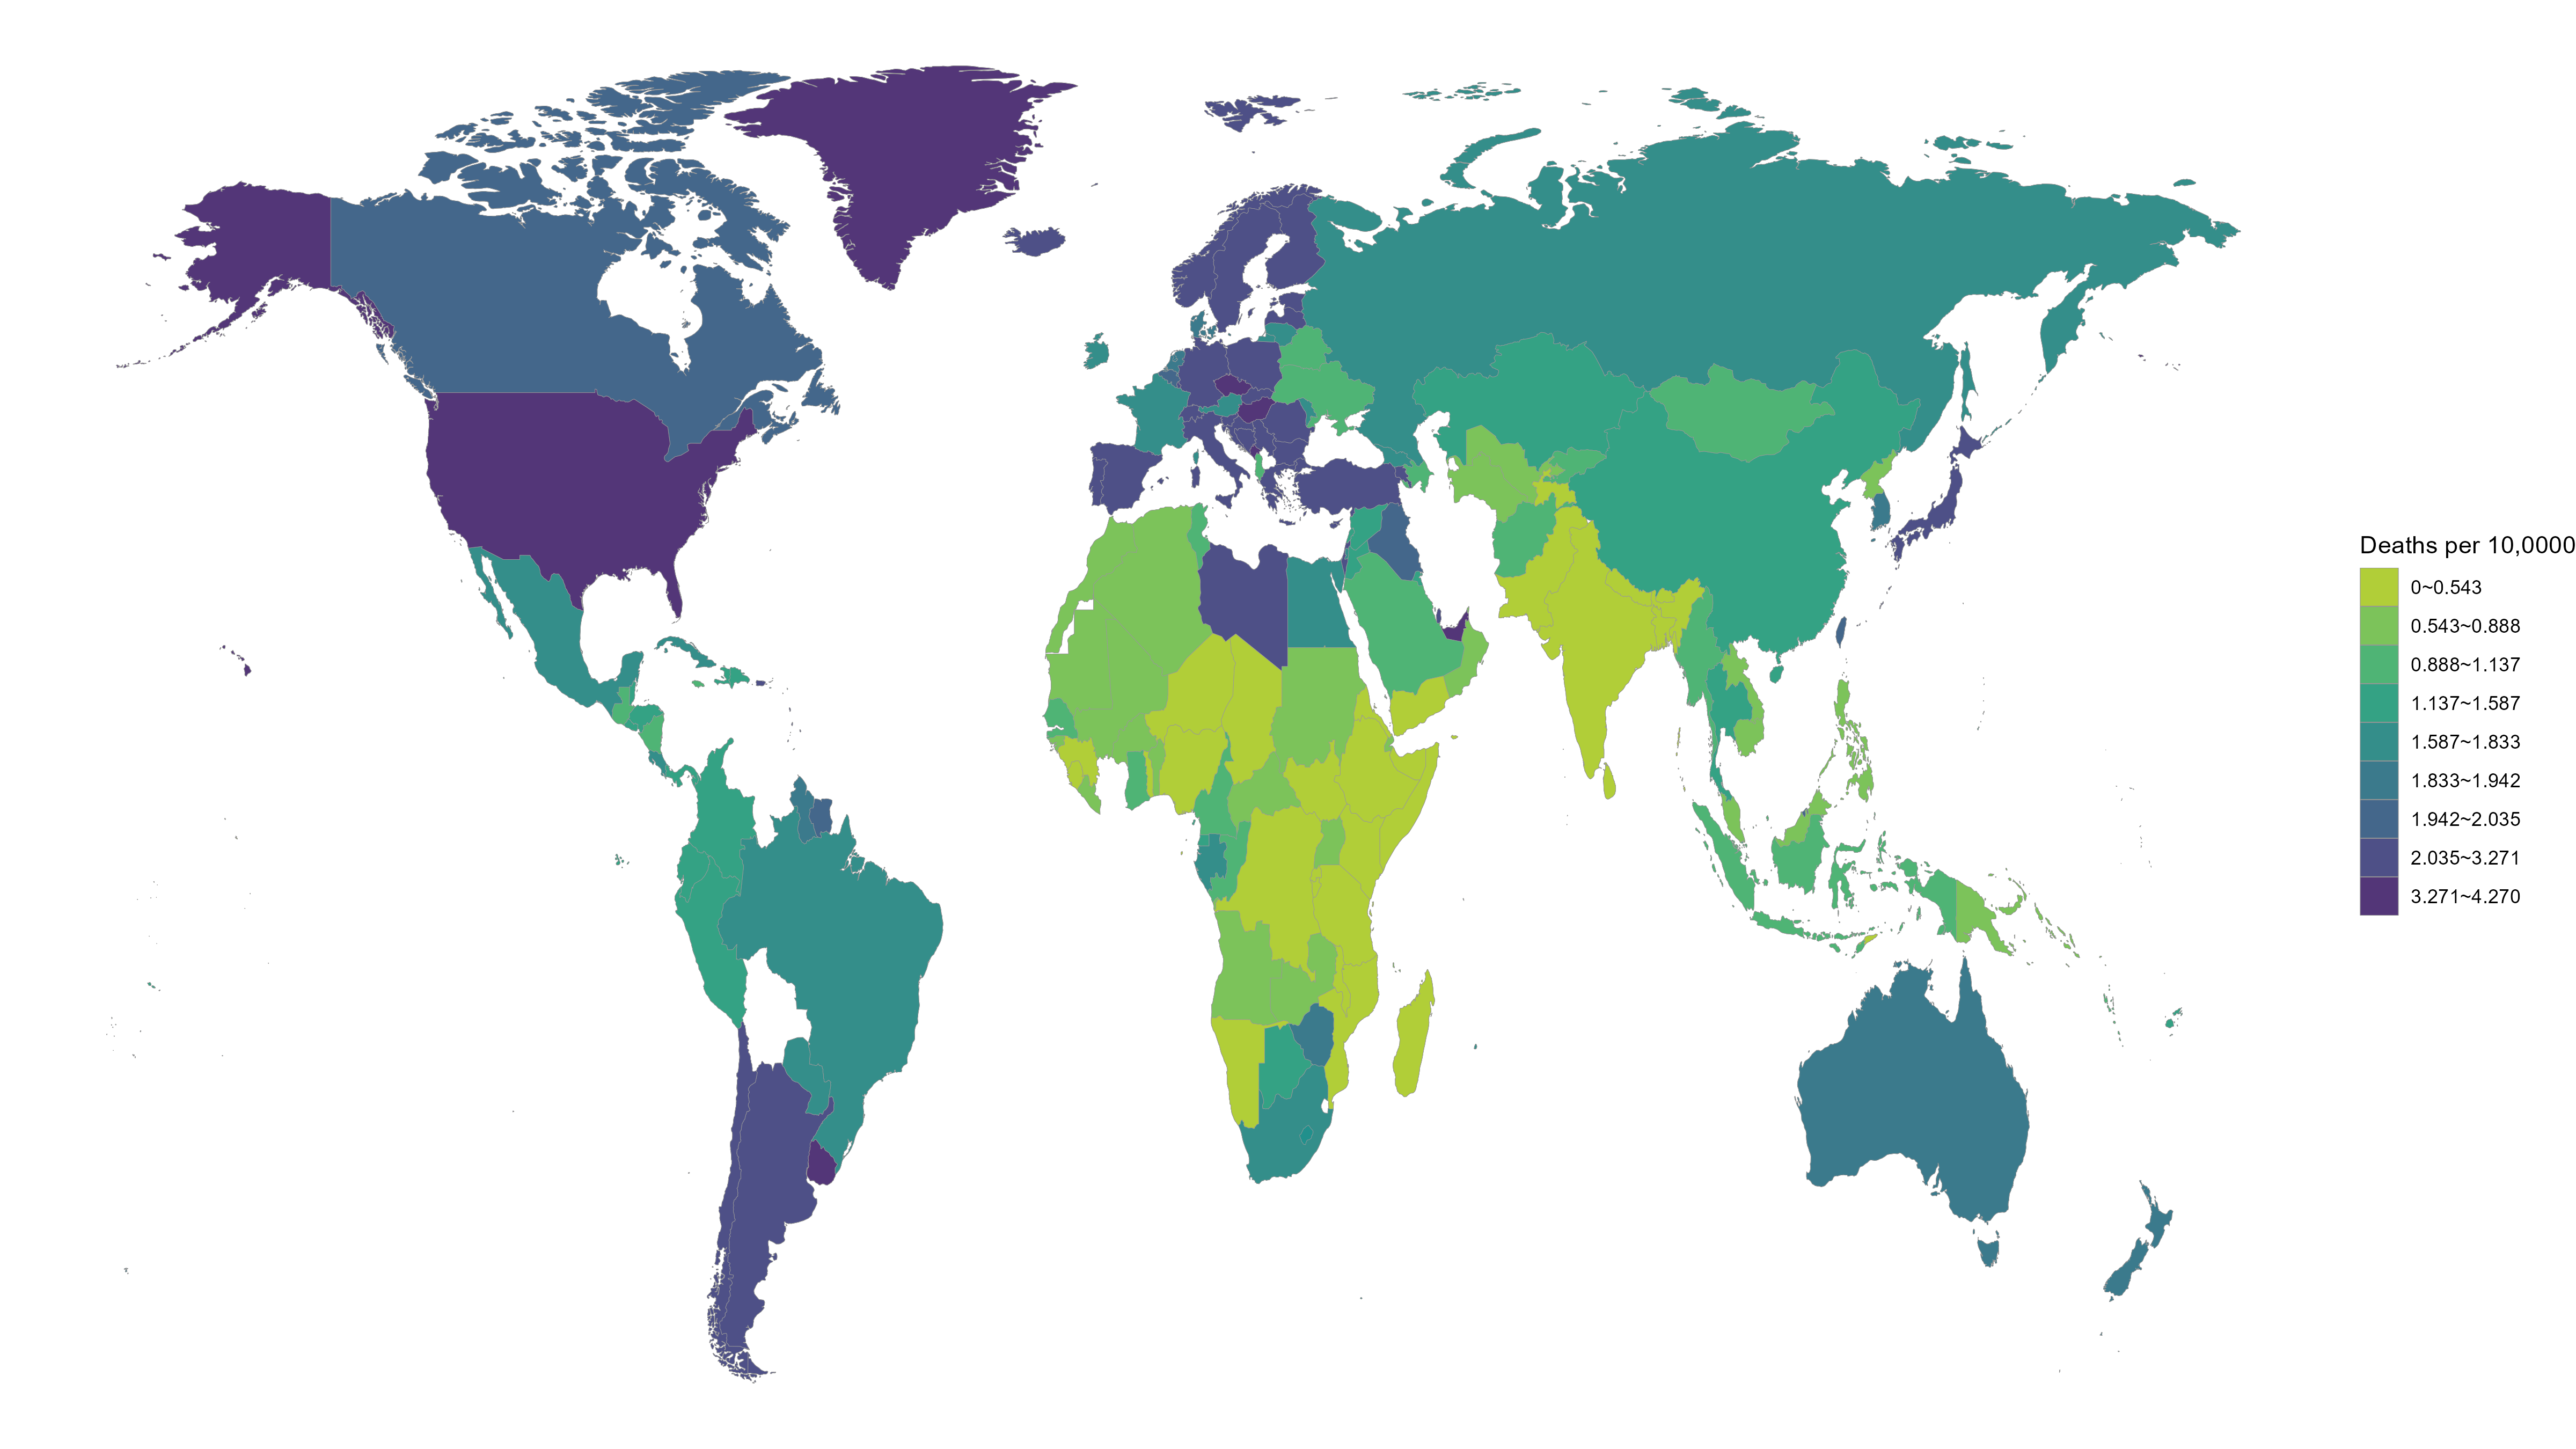

Supplement: Supplementary file 4 [file a17db1029e2cd6316377a0a8.docx]
