# Supplementary material for: An analysis of the global burden of pancreatic cancer attributable to High fasting plasma glucose: 1990– 2021
Source: Research Square preprint supplement (doi:10.21203/rs.3.rs-7063506/v1), 2025-07-25
Supplement: Supplementary file 5 [file ab70c89698ba91104e368375.xlsx]

## Sheet: Sheet1
Deaths and ASMR of PC attributable to the HFPG in 1990 and 2021 and EAPC from 1990 to 2021.
Deaths	1990		2021
	Deaths cases	ASMR (per 100,000)	Deaths cases	ASMR (per 100,000)	EAPC (1990–2021)
Location	No. (95%UI)	No. (95%UI)	No. (95%UI)	No. (95%UI)	No. (95%UI)
Global	39731.004 (4531.945,77921.638)	1.082 (0.123,2.113)	132753.256 (15076.73,252345.388)	1.565 (0.177,2.982)	1.340 (1.270,1.409)
High SDI	19592.513 (2258.893,37389.482)	1.727 (0.199,3.299)	59965.941 (6962.668,111987.722)	2.663 (0.311,4.959)	1.566 (1.474,1.659)
High-middle SDI	11800.029 (1329.982,23406.817)	1.235 (0.139,2.452)	36330.216 (4093.26,69394.324)	1.815 (0.204,3.471)	1.422 (1.332,1.513)
Middle SDI	6336.185 (714.603,12788.573)	0.687 (0.077,1.385)	26035.352 (2872.697,50724.908)	1.003 (0.11,1.96)	1.297 (1.244,1.35)
Low-middle SDI	1473.752 (158.245,2907.224)	0.272 (0.029,0.534)	8486.627 (937.098,16928.895)	0.634 (0.07,1.255)	2.885 (2.838,2.931)
Low SDI	465.435 (48.183,928.261)	0.235 (0.024,0.47)	1772.299 (184.769,3475.331)	0.401 (0.041,0.788)	1.746 (1.59,1.902)
High-income Asia Pacific	4017.284 (496.865,7308.939)	2.463 (0.303,4.467)	13335.453 (1633.737,24222.456)	2.463 0.687 (0.077,1.385)	0.586 (0.55,0.622)
Central Asia	187.746 (18.415,387.761)	1.078 (0.111,2.208)	821.669 (84.99,1670.124)	1.078 0.272 (0.029,0.534)	3.568 (3.298,3.838)
East Asia	7199.084 (810.371,14377.087)	1.257 (0.139,2.402)	27345.998 (3057.167,52008.509)	1.257 2.663 (0.311,4.959)	1.269 (1.094,1.445)
South Asia	1133.823 (125.839,2206.946)	0.432 (0.047,0.818)	6003.613 (658.839,11398.088)	0.432 6.008 (0.645,11.894)	2.041 (1.93,2.153)
Southeast Asia	919.916 (92.035,1949.158)	0.884 (0.089,1.817)	5288.719 (533.037,10904.134)	0.884 1.727 (0.199,3.299)	2.417 (2.346,2.489)
Australasia	312.82 (37.962,571.465)	1.878 (0.237,3.286)	1066.502 (134.37,1870.312)	1.878 0.235 (0.024,0.47)	1.369 (1.285,1.452)
Caribbean	328.259 (35.934,645.625)	1.594 (0.186,3.13)	862.054 (100.463,1692.898)	1.594 1.003 (0.11,1.96)	1.098 (0.941,1.256)
Central Europe	2580.546 (297.29,4985.212)	2.839 (0.343,5.302)	6619.688 (797.122,12371.314)	2.839 1.815 (0.204,3.471)	1.651 (1.545,1.756)
Eastern Europe	2541.938 (266.801,5276.939)	1.644 (0.174,3.268)	2541.938 (266.801,5276.939)	1.644 0.634 (0.07,1.255)	2.02 (1.823,2.217)
Western Europe	9370.584(100.497,18683.482)	2.33 (0.243,4.626)	23775.411(2471.032,47368.029)	2.33 53.796 (6.341,99.482)	1.533 (1.472,1.594)
Andean Latin America	135.722 (13.046,292.284)	1.41 (0.146,2.939)	135.722 (13.046,292.284)	1.41 0.401 (0.041,0.788)	2.284 (2.125,2.443)
Central Latin America	1013.519 (118.283,1917.368)	1.516 (0.183,2.911)	3699.957 (449.207,7099.667)	1.516 36.445 (4.214,70.155)	0.128 (0.021,0.236)
Southern Latin America	800.513 (88.325,1556.836)	2.526 (0.294,4.825)	2267.626 (263.491,4335.275)	2.526 27.402 (3.085,54.29)	1.387 (1.248,1.526)
Tropical Latin America	935.988 (96.235,1884.643)	1.674 (0.19,3.171)	4237.016 (482.896,8030.615)	1.674 15.166 (1.715,30.567)	1.513 (1.437,1.59)
North Africa and Middle East	885.268 (93.733,1779.575)	1.504 (0.17,2.851)	6100.39 (695.784,11538.192)	1.504 8.596 (0.902,16.873)	3.453 (3.302,3.604)
High-income North America	6810.223 (818.537,12764.455)	3.19 (0.392,5.807)	22015.373 (2700.6,40149.115)	3.19 38.862 (4.415,74.422)	1.959 (1.779,2.14)
Oceania	13.994 (1.578,27.535)	0.816 (0.097,1.58)	52.202 (6.159,102.431)	0.816 1.235 (0.139,2.452)	1.232 (1.166,1.298)
Central Sub-Saharan Africa	93.9 (10.597,181.829)	0.635 (0.074,1.291)	297.607 (35.204,606.348)	0.635 1.727 (0.199,3.299)	0.77 (0.518,1.022)
Eastern Sub-Saharan Africa	136.825 (13.076,293.386)	0.388 (0.037,0.834)	544.243 (52.306,1193.388)	0.388 5.193 (0.539,10.359)	1.703 (1.595,1.811)
Southern Sub-Saharan Africa	184.538 (17.448,391.888)	1.639 (0.15,3.337)	844.553 (77.979,1724.262)	1.639 2.663 (0.311,4.959)	2.642 (2.308,2.978)
Western Sub-Saharan Africa	128.515 (13.249,260.473)	0.496 (0.051,1.022)	823.489 (84.758,1706.54)	0.496 1.235 (0.139,2.452)	3.921 (3.793,4.049)
