# Supplementary material for: An analysis of the global burden of pancreatic cancer attributable to High fasting plasma glucose: 1990– 2021
Source: Research Square preprint supplement (doi:10.21203/rs.3.rs-7063506/v1), 2025-07-25
Supplement: Supplementary file 6 [file d8965829f6d1ac60f33bc639.docx]

Age-specific numbers and rates of DALYs and deaths of PC attributable to HFPG by age and sex, in 2021,different SDIs.


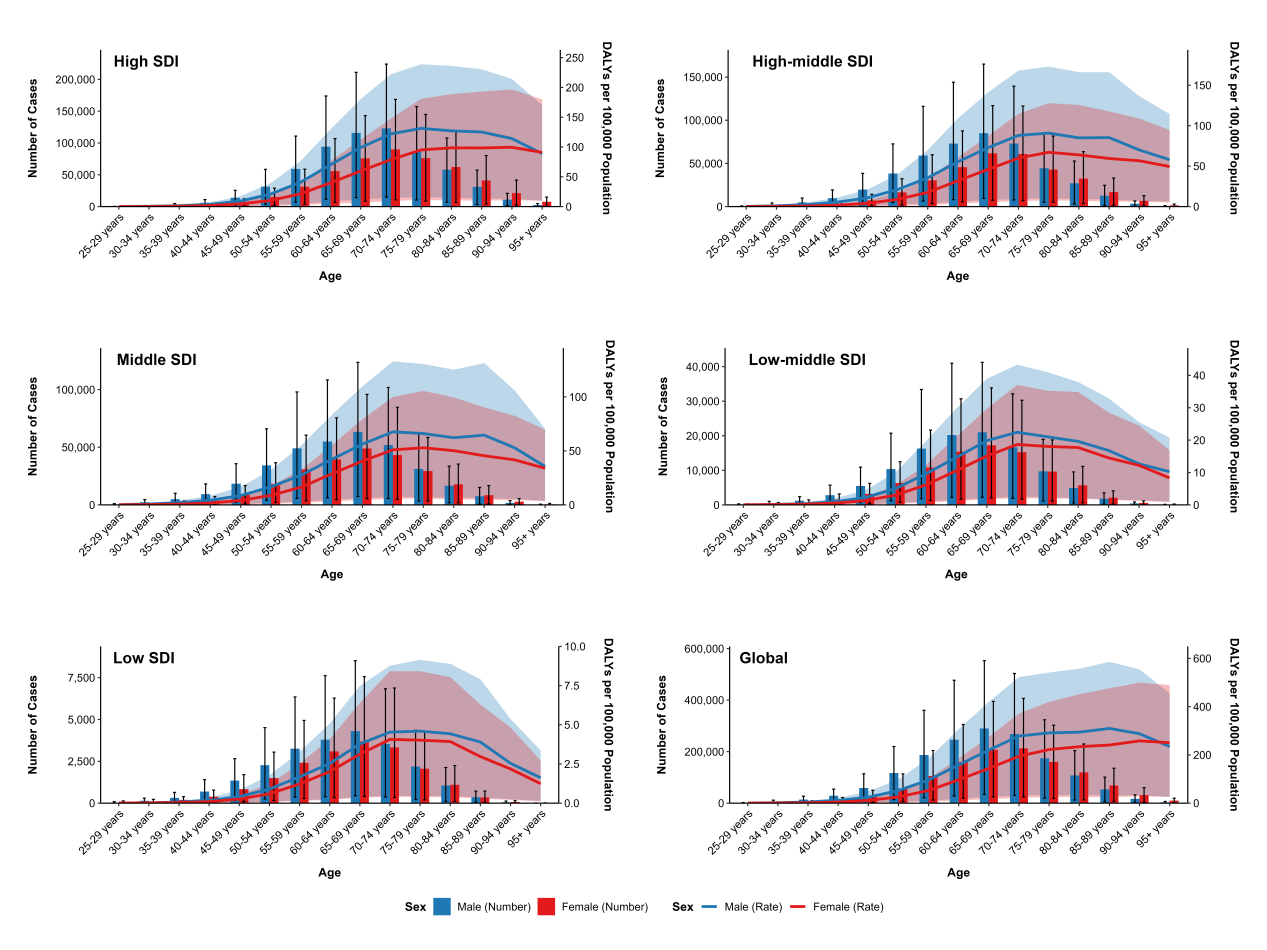


Age-specific numbers and rates of Deaths and deaths of PC attributable to HFPG by age and sex, in 2021,different SDIs.
